# Supplementary material
Source: publisher figshare collection journal article supplement (https://acs.figshare.com/ndownloader/files/9776485)
Supplement: Supplementary file 1 [file 9776485]

*Supporting Information.*

# Characterization of Platinum Electrode Surfaces by Electrochemical Surface Forces Measurement

*Sho Fujii,<sup>†,§</sup> Motohiro Kasuya,<sup>‡</sup> Kazue Kurihara<sup>\*†,‡</sup>*

<sup>†</sup>Advanced Institute for Materials Research (AIMR), Tohoku University

<sup>‡</sup>Institute of Multidisciplinary Research for Advanced Materials (IMRAM), Tohoku University, 2-1-1 Katahira, Aoba-ku, Sendai 980-8577

Corresponding Author

\* [kurihara@tagen.tohoku.ac.jp](mailto:kurihara@tagen.tohoku.ac.jp)

Present Addresses

<sup>§</sup>Department of Chemistry, Faculty of Science, Hokkaido University, Kita-10, Nishi-8, Kita-ku, Sapporo, 060-0810, Japan

(a)

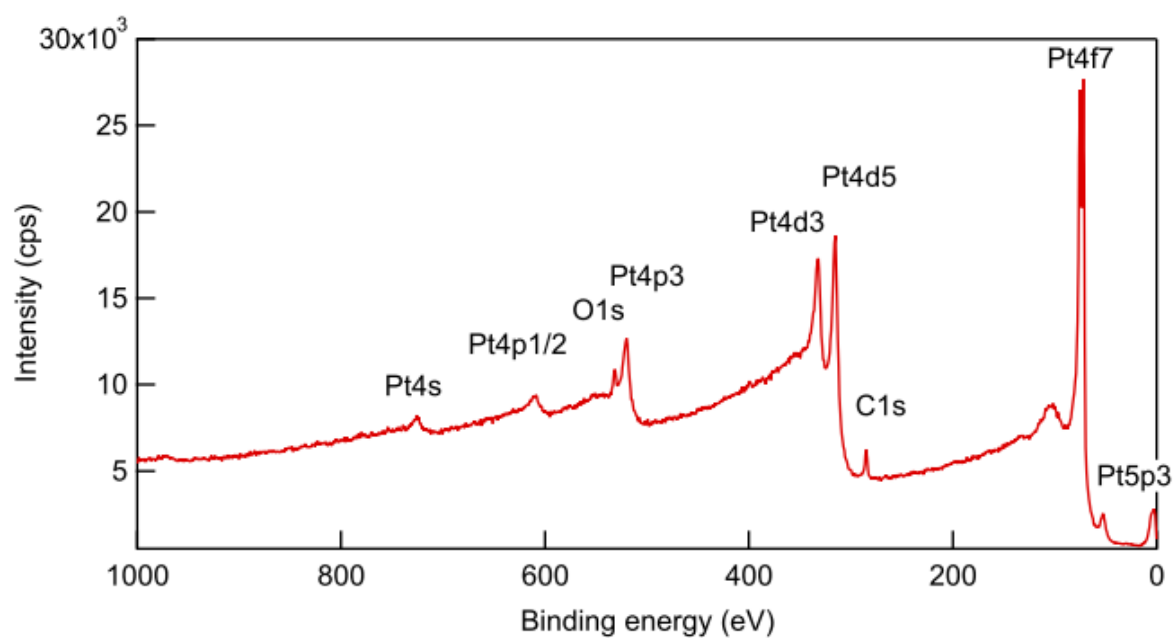

(b)

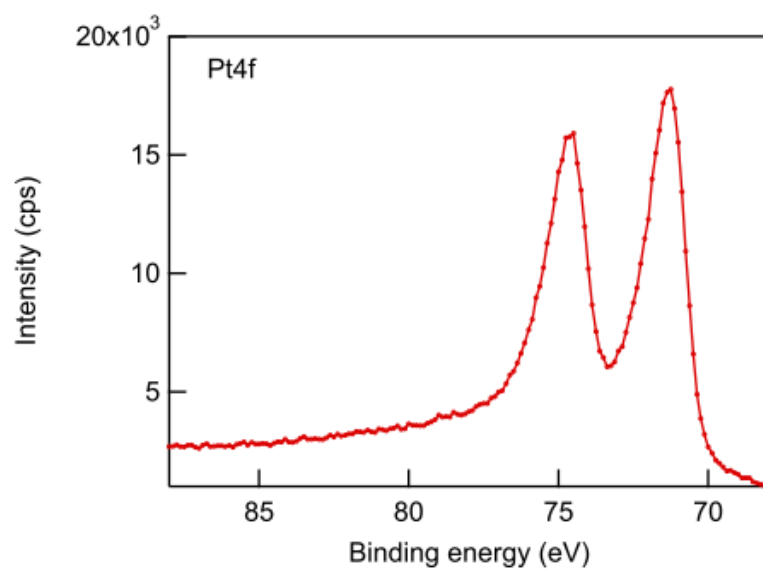

**Figure S1.** (a) XPS wide-scan spectrum of template-stripped Pt surface. (b) High-resolution spectrum for the Pt4f region.

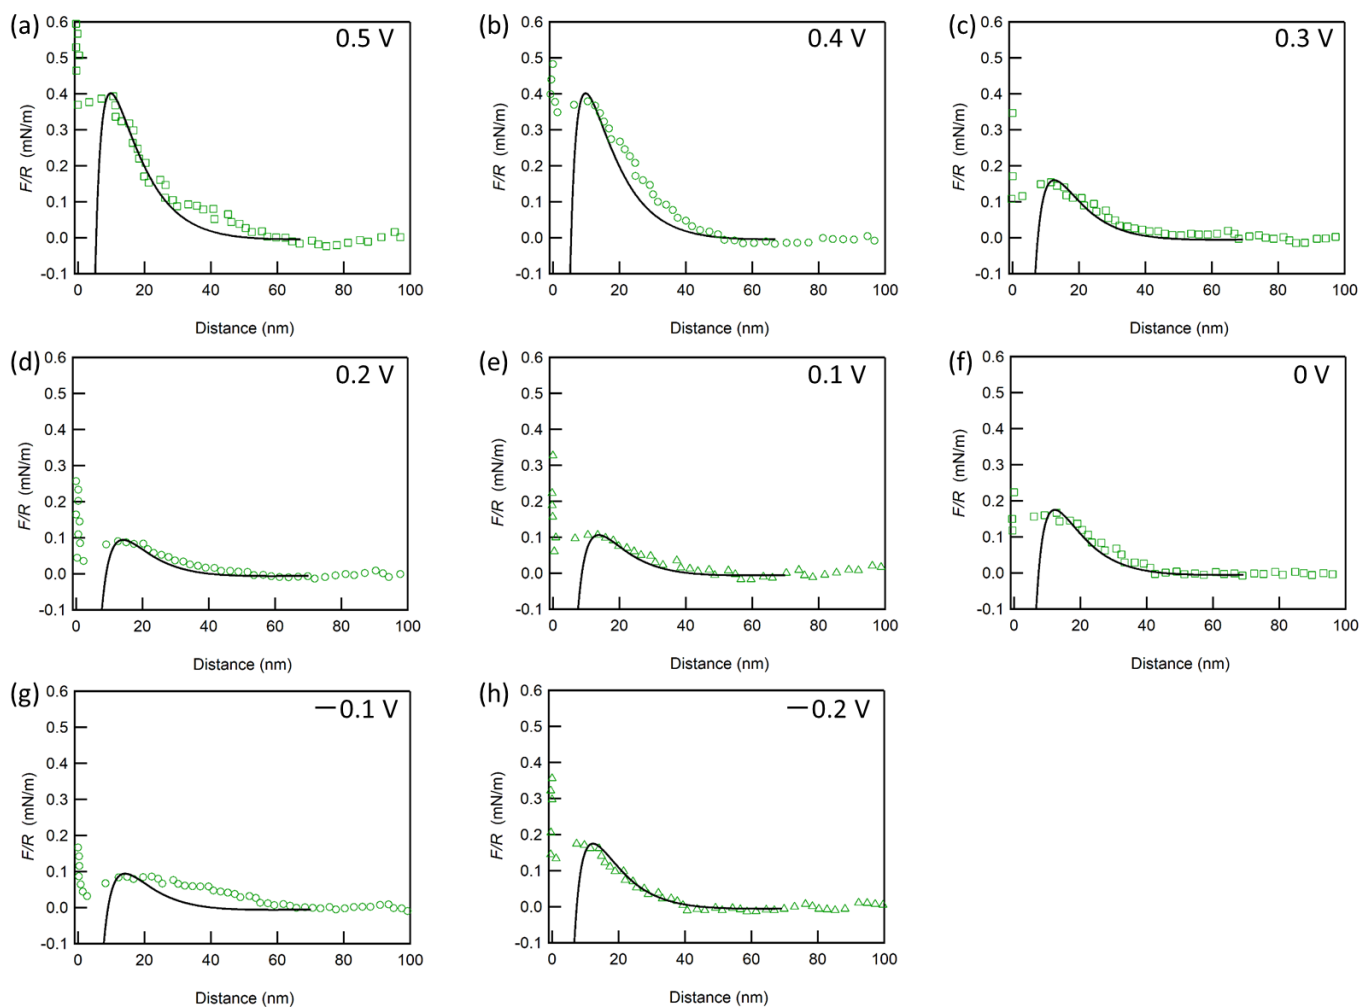

**Figure S2.** Surface force curves between Pt electrode surfaces and their fitting curves with the DLVO theory (solid lines) at applied potential = 0.5 V, 0.4 V, 0.3 V, 0.2 V, 0.1 V, 0 V, -0.1 V, and -0.2 V vs. Ag/AgCl.

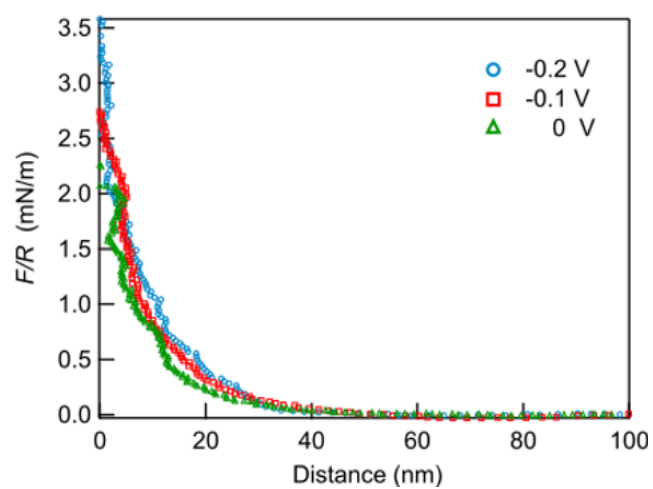

**Figure S3.** Surface force curves between mica and Pt electrode surface of which electrochemical potential was controlled at  $-0.2$ ,  $-0.1$ ,  $0$  V vs. Ag/AgCl.
